# Supplementary material for: AbaA Regulates Conidiogenesis in the Ascomycete Fungus Fusarium graminearum
Source: PubMed Central journal article supplement (PMC3769392; doi:10.1371/journal.pone.0072915), 2013-09-10
Supplement: pone.0072915.s003.pdf [file pone.0072915.s003.pdf]

**Table S1. Primers used in this study**

| Primer        | Sequence (5'→3')                               | Description                                                                                                                                      |
|---------------|------------------------------------------------|--------------------------------------------------------------------------------------------------------------------------------------------------|
| AbaA-5F       | AACCTCACTGTTTGTGCGGAACTTA                      | Forward and reverse primers for amplification of the 5'-flanking region of <i>abaA</i> with a tail for geneticin resistance gene cassette fusion |
| AbaA-5R       | gcacaggtacacttgtagagGTCAAGTCAGGTAAGGACGCTGTCAT |                                                                                                                                                  |
| AbaA-3F       | cctcaatatcatctctgtcgTAACGCAGAGTGTGACACTGGCC    | Forward and reverse primers for amplification of the 3'-flanking region of <i>abaA</i> with a tail for geneticin resistance gene cassette fusion |
| AbaA-3R       | GTCGTCATCTCATGGTTTTTATCGC                      |                                                                                                                                                  |
| AbaA-5N       | CGAAGAAACCAGGGCAGACACTTA                       | Forward and reverse nest primers for third fusion PCR for amplification of the <i>abaA</i> deletion construct                                    |
| AbaA-3N       | TTGATCAAGCGCCCTAAATAACTCC                      |                                                                                                                                                  |
| Gen-for       | CGACAGAAGATGATATTGAAGG                         | Forward and reverse primers for amplification of the geneticin cassette from the pII99 vector                                                    |
| Gen-rev       | CTCTAAACAAGTGACCTGTG                           |                                                                                                                                                  |
| pPRN3-N-For   | GTCGAAAATTCAAGACAAGG                           | For RACE-PCR                                                                                                                                     |
| pPRN3-N-Rev   | AAGCGTGACATAACTAATTAC                          | For RACE-PCR                                                                                                                                     |
| AbaA-RACE-1   | AGTACCGCAACCGACAAGCACA                         | For RACE-PCR and sequencing of <i>abaA</i>                                                                                                       |
| AbaA-RACE-2   | TGCTGCTGTCATTGTTGGTGGTAT                       |                                                                                                                                                  |
| AbaA-RACE-3   | GTCTCTTCTCCGAGGTCAAGTTCAG                      |                                                                                                                                                  |
| AbaA-RACE-4   | GATTGAAGGAGTAGGAGACATGATGGAG                   |                                                                                                                                                  |
| AbaA-RACE-5   | ACACAATCACAATGGGCACAAATG                       |                                                                                                                                                  |
| AbaA-RACE-6   | TTCTGGCGATTCAACACAATAACC                       |                                                                                                                                                  |
| AbaA-RACE-7   | CAACACAGATTGTGAAGATGTATTTCGCTA                 |                                                                                                                                                  |
| AbaA-RACE-8   | TTACACACTTCCAGCGGTGGCTT                        |                                                                                                                                                  |
| AbaA-RT-For   | ACTCAGGAAGCTTTGACCACGGC                        | For real-time PCR of <i>abaA</i>                                                                                                                 |
| AbaA-RT-Rev   | GGGCTCTGGTAGGGGTTGACAGTA                       |                                                                                                                                                  |
| WetA-RT-For   | GTTCCAGGTACTCCCCTGCCAT                         | For real-time PCR of <i>wetA</i>                                                                                                                 |
| WetA-RT-Rev   | ACGTTCTCGTCGCGCTTTGGT                          |                                                                                                                                                  |
| GzCyp1-RT-for | TCAAGCTCAAGCACACCAAGAAGG                       | For real-time PCR of <i>Gzcyp1</i>                                                                                                               |

|                  |                                                   |                                                                                                                            |
|------------------|---------------------------------------------------|----------------------------------------------------------------------------------------------------------------------------|
| GzCyp1-RT-rev    | GGTCCGCCGCTCCAGTCT                                |                                                                                                                            |
| AbaA-5R OE       | gatagtggaaccgacgccccGAATTCAAGACGTGGAATGGTGGG      | Reverse primer for amplification of the 5'-flanking region of <i>abaA</i> with a tail for <i>eflA</i> promoter replacement |
| AbaA-3F OE       | tatcacaaaaggaaccaatcttcaaagACAAACCGTCGCCATGTCTTCA | Forward and reverse primers for amplification of the 3'-flanking region of <i>abaA</i> with a tail for                     |
| AbaA-3R OE       | CCTGAGTACGACCCTTGTAGACC                           | <i>eflA</i> promoter replacement                                                                                           |
| AbaA-3N OE       | GTAAGTCCATTGTTTGTGCAGTG                           | Reverse nest primer for amplification of the <i>AbaA</i> promoter replacement with the <i>eflA</i> promoter                |
| Neo-For new      | GGGGCGTCGGTTTCCACTATC                             |                                                                                                                            |
| EF Pro-Rev new   | CTTTGAAGATTGGGTTCTTTTGTGATA                       | Forward and reverse primers for amplification of <i>gen-P<sub>eflA</sub></i> from the pSKGEN vector                        |
| Neo-For 5N       | GGCGAGTACTGCCAGCAGTAGACAC                         | Forward nest primer for amplification of the <i>abaA</i> promoter replacement with the <i>eflA</i> promoter                |
| AbaA-5R AnabaA   | aattccaaagacgagatattgagGGGAGCTGGAAGGCTGGC         |                                                                                                                            |
| AnAbaA-For       | CTCAATATCTCGTCTTTGGAATT                           |                                                                                                                            |
| AnabaA-Rev hyg   | tgagacaaatgggttcaggatctcTTATGAATTAAGAGGTTCTCCCCTG | Primers used for interspecies complementation using <i>A. nidulans</i> AbaA                                                |
| pBCATPH-comp-3 R | GAGATCCTGAACACCATTTGTCTCA                         |                                                                                                                            |
